# Supplementary material for: Mussel-inspired polydopamine-modified silk nanofibers as an eco-friendly and highly efficient adsorbent for cationic dyes
Source: Royal Society of Chemistry journal article supplement (doi:10.1039/d2nj06055h), 2023-01-01
Supplement: d2nj06055h1.pdf [file d2nj06055h1.pdf]

## Supporting Information

### **Mussel-inspired polydopamine-modified silk nanofibers as an eco-friendly and high-efficient adsorbent for cationic dye**

Heng He <sup>a</sup>, Mingguang Huang <sup>b</sup>, Zhiwei Gao <sup>c</sup>, Yifan Zhou <sup>a</sup>, Yuxiang Zhao <sup>a</sup>, Yan Chen <sup>a</sup>, Yingchun Gu <sup>a,\*</sup>, Sheng Chen <sup>a,\*</sup>, Bin Yan <sup>a</sup>

<sup>a</sup> College of Biomass Science and Engineering, National Engineering Laboratory for Clean Technology of Leather Manufacture, Sichuan University, Chengdu 610065, China

<sup>b</sup> Key Laboratory of Fine Chemical Application Technology of Luzhou, Luzhou 646099, China

<sup>c</sup> Xinjiang Xinchun Petroleum Development Co., Ltd., Sinopec, Dongying 257000, China

\* Corresponding author. E-mail addresses: [chensheng@scu.edu.cn](mailto:chensheng@scu.edu.cn) (S. Chen), [guyingchun@scu.edu.cn](mailto:guyingchun@scu.edu.cn) (Y.C. Gu).

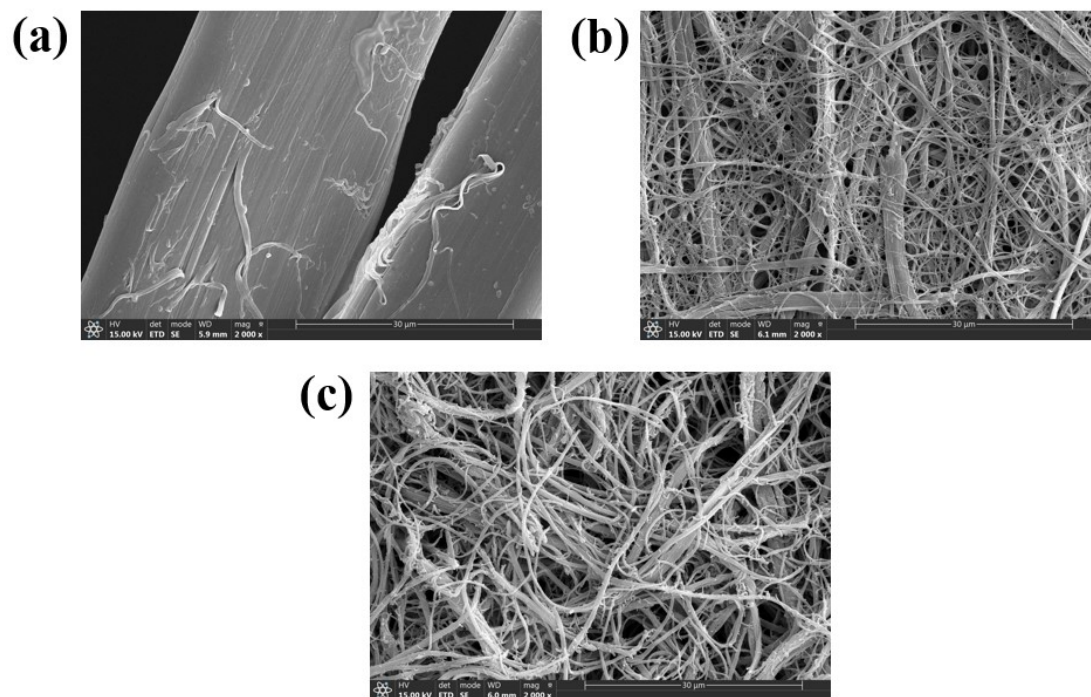

**Figure S1.** 2000 $\times$  SEM images of silk (a), SNFs (b), SNFs@PDA (c).

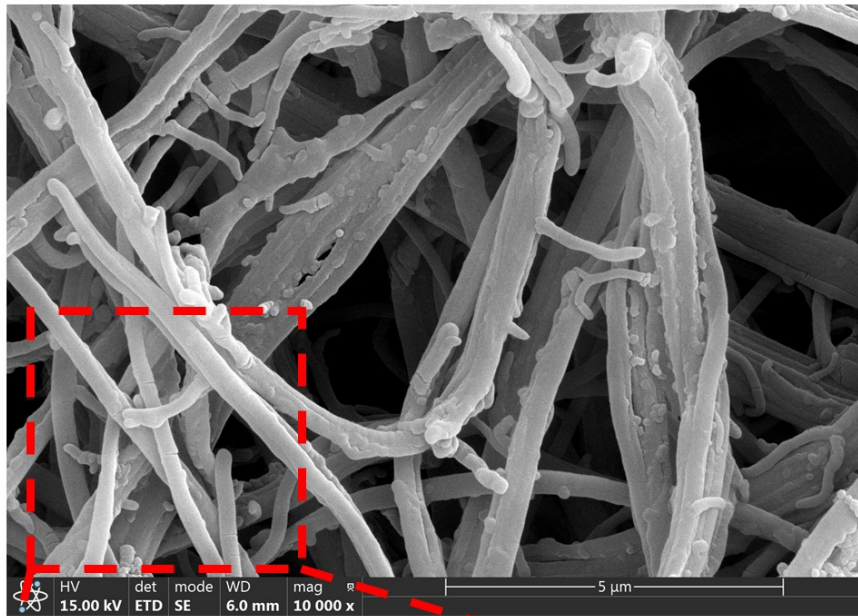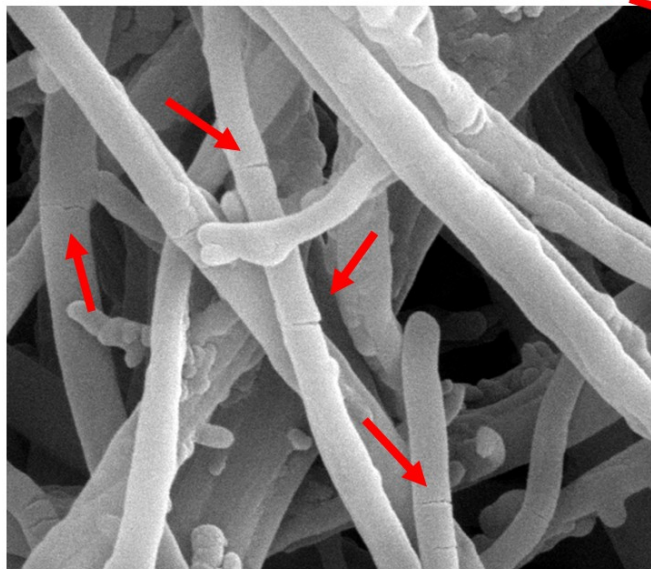

**Figure S2.** The details SEM of SNF@PDA.

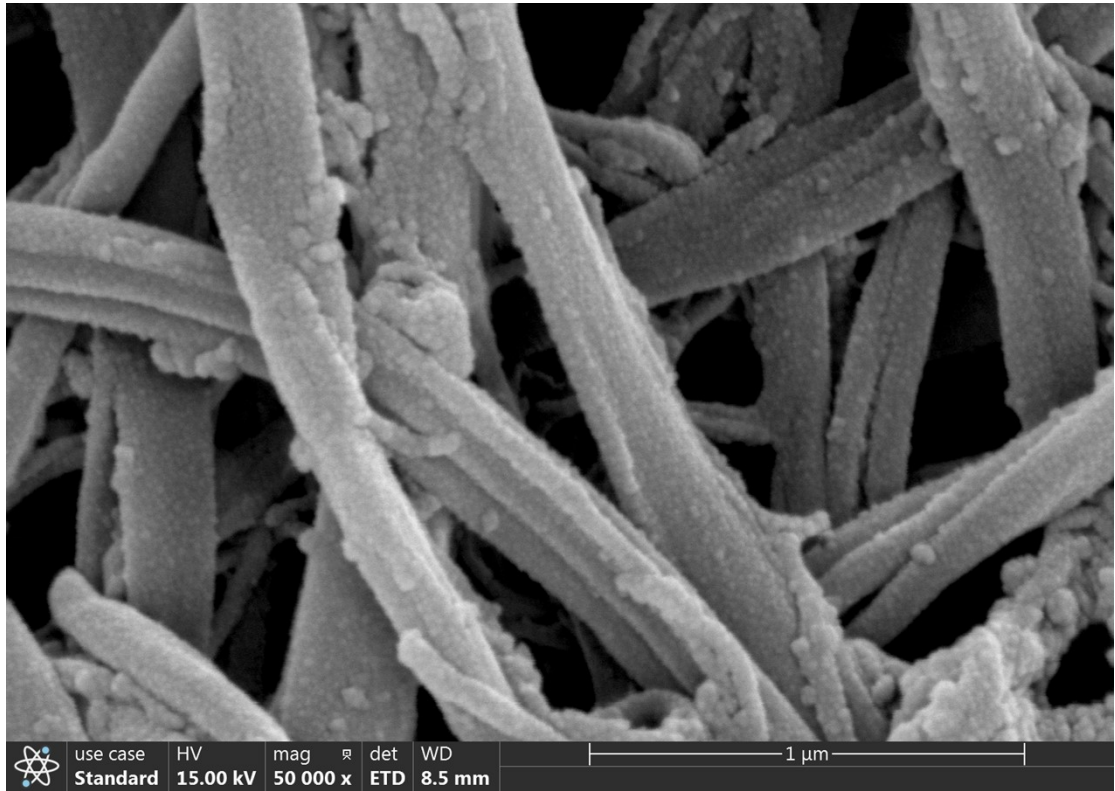

**Figure S3.** The SEM image of SNFs@PDA with SNFs mass ratio PDA is 1 to 1.5.

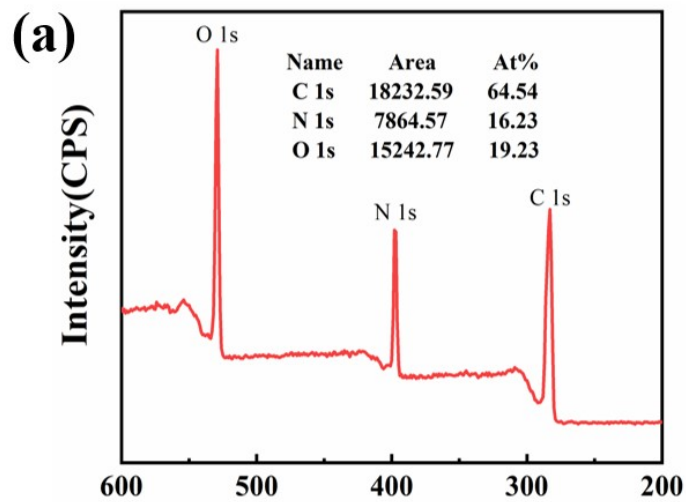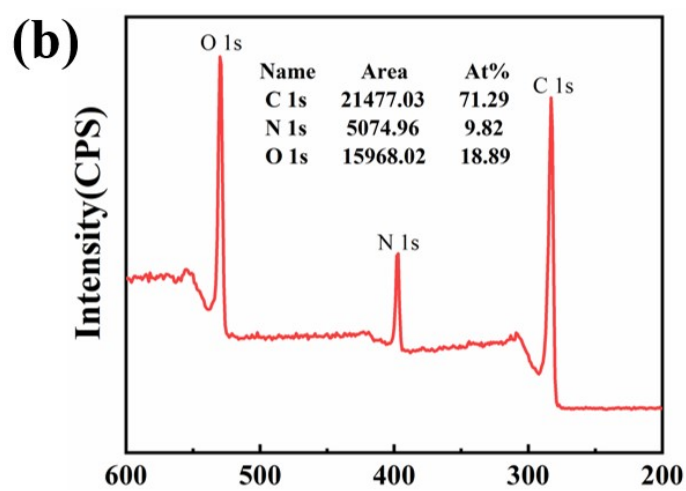

**Figure S4.** Full-range XPS spectra of SNFs (a) and SNFs@PDA (b).

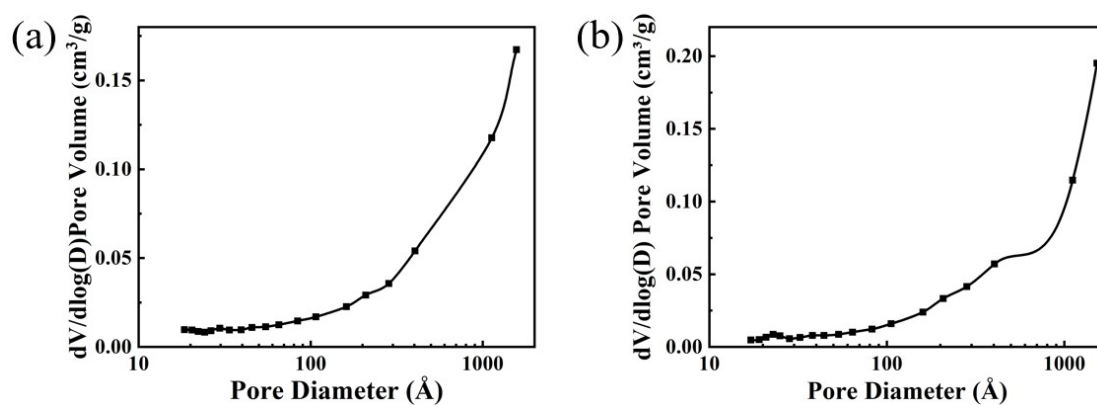

**Figure S5.** The pore size distribution of SNFs (a) and SNFs@PDA (b).

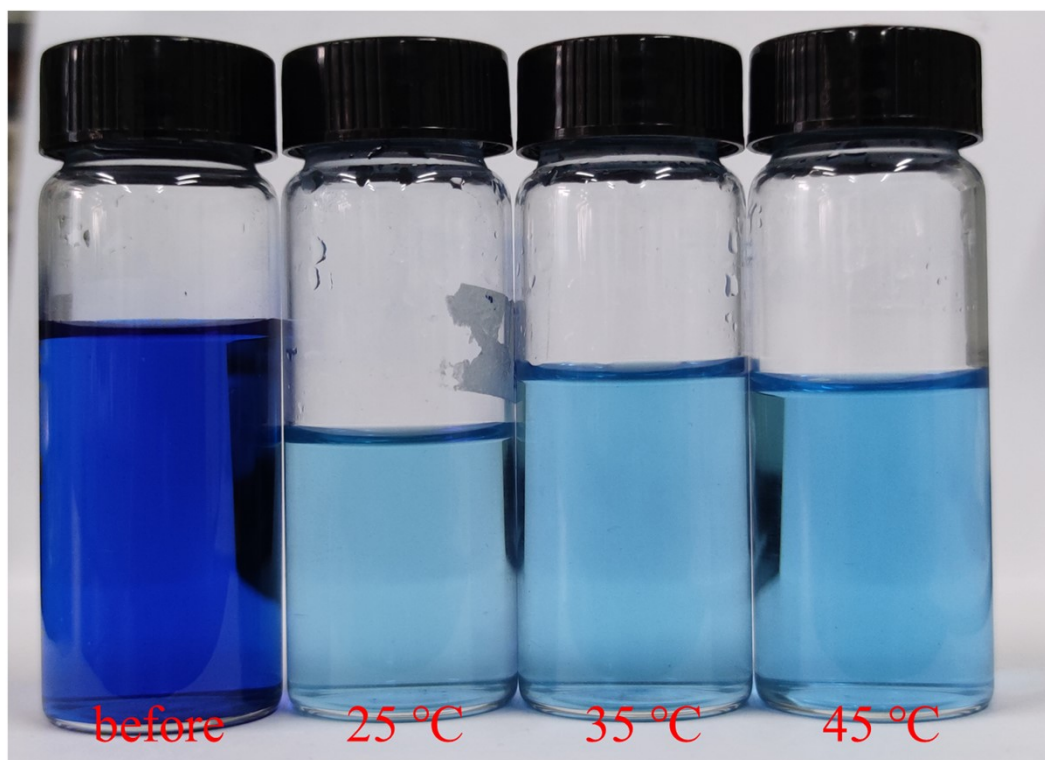

**Figure S6.** Digital photos before and after adsorption at different temperatures.

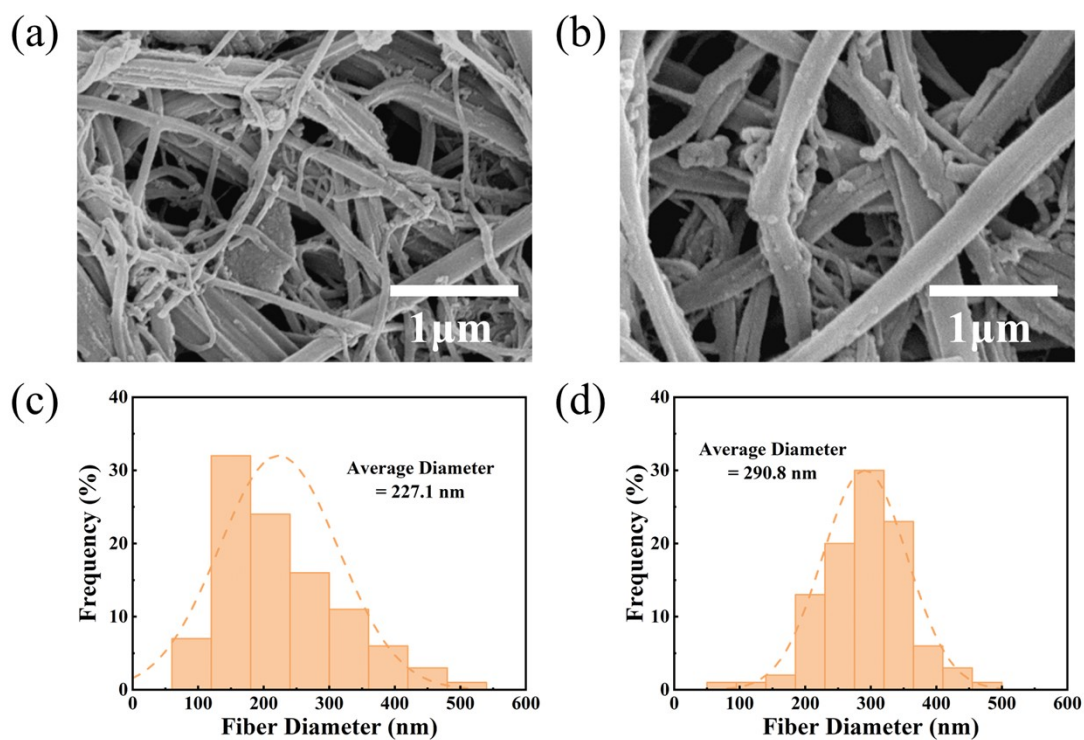

**Figure S7.** SEM images and diameter statistics of SNFs mass ratio PDA is 1 to 0.5 (a, c) and SNFs mass ratio PDA is 1 to 1.5 (b, d).

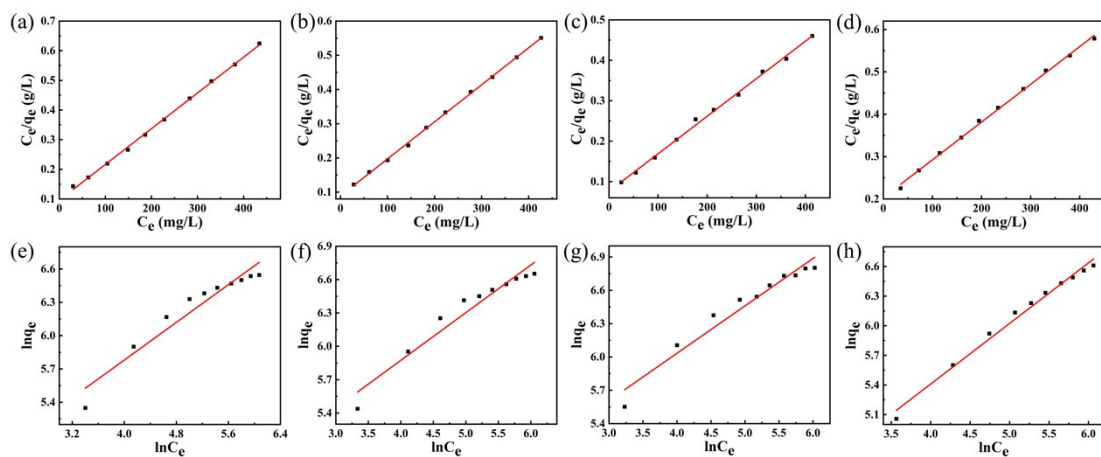

**Figure S8.** (a), (b), (c) and (d) is the Langmuir isotherm model for 12h, 18h, 24h, 30h, respectively; (e), (f), (g) and (h) is the Freundlich isotherm model for 12h, 18h, 24h, 30h, respectively.

**Table S1.** Isothermal adsorption model at pH 7 for SNFs@PDA with different polymerization reaction times to DA.

| Langmuir model |              |              |               |       | Freundlich model |      |       |
|----------------|--------------|--------------|---------------|-------|------------------|------|-------|
| name           | $q_m$ (mg/g) | $K_L$ (L/mg) | $R_L$         | $R^2$ | $K_F$ (L/mg)     | n    | $R^2$ |
| 12h            | 826.44       | 0.0126       | 0.1365-0.6125 | 0.998 | 59.33            | 2.36 | 0.928 |
| 18h            | 925.92       | 0.0121       | 0.1414-0.6223 | 0.999 | 64.11            | 2.33 | 0.944 |
| 24h            | 1077.42      | 0.0122       | 0.1408-0.6211 | 0.997 | 75.71            | 2.37 | 0.953 |
| 30h            | 1122.16      | 0.0043       | 0.3131-0.8201 | 0.997 | 81.43            | 2.41 | 0.988 |

12h, 18h, 24h, and 30h are the corresponding times for the dopamine polymerization reaction, respectively.
